# Supplementary material
Source: publisher figshare collection journal article supplement (https://tandf.figshare.com/ndownloader/files/16409168)
Supplement: Supplementary file 1 [file 16409168]

Table S1. Comparison of the intensity of analyzed spots in relation to spot No. 2.

| **Origin of strains** | **No. spot** | | | | | | | | | | | | | | | | | | | | |
| --- | --- | --- | --- | --- | --- | --- | --- | --- | --- | --- | --- | --- | --- | --- | --- | --- | --- | --- | --- | --- | --- |
| **1** | **2** | **3** | **4** | **5** | **6*** | **7*** | **8*** | **9*** | **10** | **11** | **12** | **13** | **14** | **15** | **16** | **17*** | **18** | **19** | **20** | **21** |
| % of intensity vs. spot No. 2 | | | | | | | | | | | | | | | | | | | | |
| **dogs without *otitis externa* symptoms** | 91,3  ± 11,1 | 100 | 92,9  ±  9,0 | 69,3  ±  8,5 | 59,8  ± 13,2 | 71,5  ±  7,0 | 0,0  ±  0,0 | 69,9  ±  8,9 | 65,6  ±  7,1 | 68,5  ± 15,3 | 83,2  ± 18,0 | 83,6  ±  9,8 | 88,3  ± 16,0 | 67,8  ± 10,5 | 81,7  ±  8,1 | 80,5  ± 12,0 | 76,5  ±  9,6 | 68,4  ± 19,2 | 76,7  ±  6,0 | 78,4  ± 10,2 | 71,1  ±  8,0 |
| **dogs with *otitis externa*** | 83,6  ±  6,2 | 100 | 97,1  ±  6,2 | 64,1  ± 11,3 | 62,9  ±  8,0 | 95,9  ±  8,1 | 85,5  ±  6,8 | 88,1  ±  6,1 | 87,6  ± 10,0 | 78,6  ±  9,2 | 76,3  ± 14,0 | 73,4  ± 12,9 | 86,3  ± 12,4 | 83,6  ±  7,0 | 72,1  ±  6,5 | 69,1  ±  9,6 | 0,0  ±  0,0 | 77,6  ± 13,1 | 63,5  ± 14,4 | 69,3  ± 23,0 | 78,8  ± 15,3 |

* statistically significant differences, Mann-Whitney *U* test, *P* < 0.01
